# Supplementary material for: Ticks as Vectors of Trypanosomatidae with Medical or Veterinary Interest: Insights and Implications from a Comprehensive Systematic Review and Meta-Analysis
Source: Preprints.org preprint supplement (doi:10.20944/preprints202407.1630.v1), 2024-07-19
Supplement: Supplementary file 2 [file supplementary]

**Table S1.** Egger’s for publication bias

| slope | bias | se.bias | t | df | p-value |
| --- | --- | --- | --- | --- | --- |
| 0.0526 | 6.2469 | 1.5044 | 4.15 | 40 | 0.0002 |


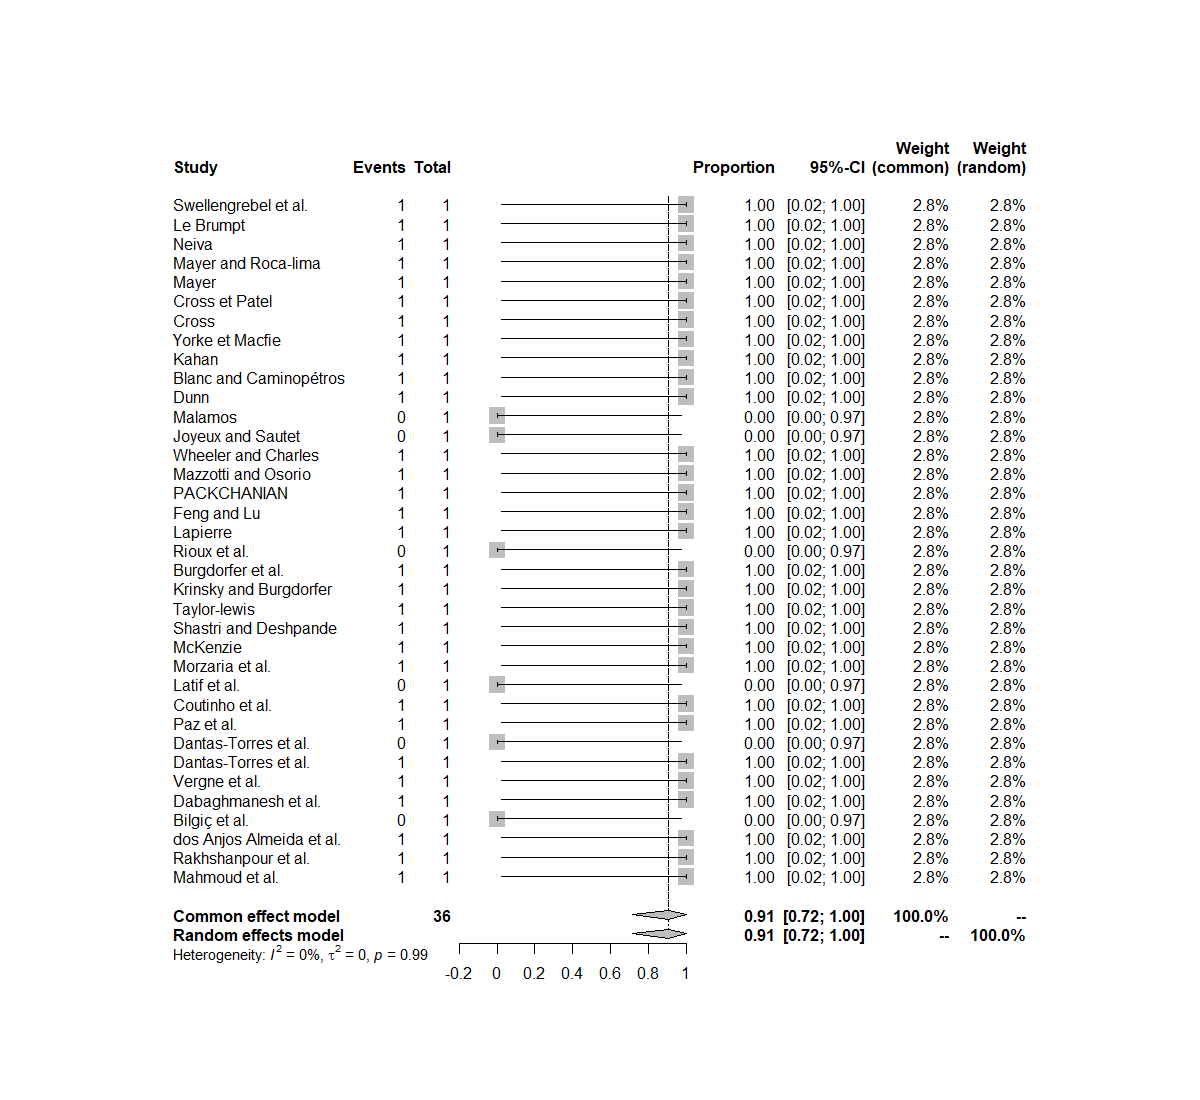


**Figure S1**: Forest plot representation of Trypanosomatidae pathogen ingestion via tick blood feeding.


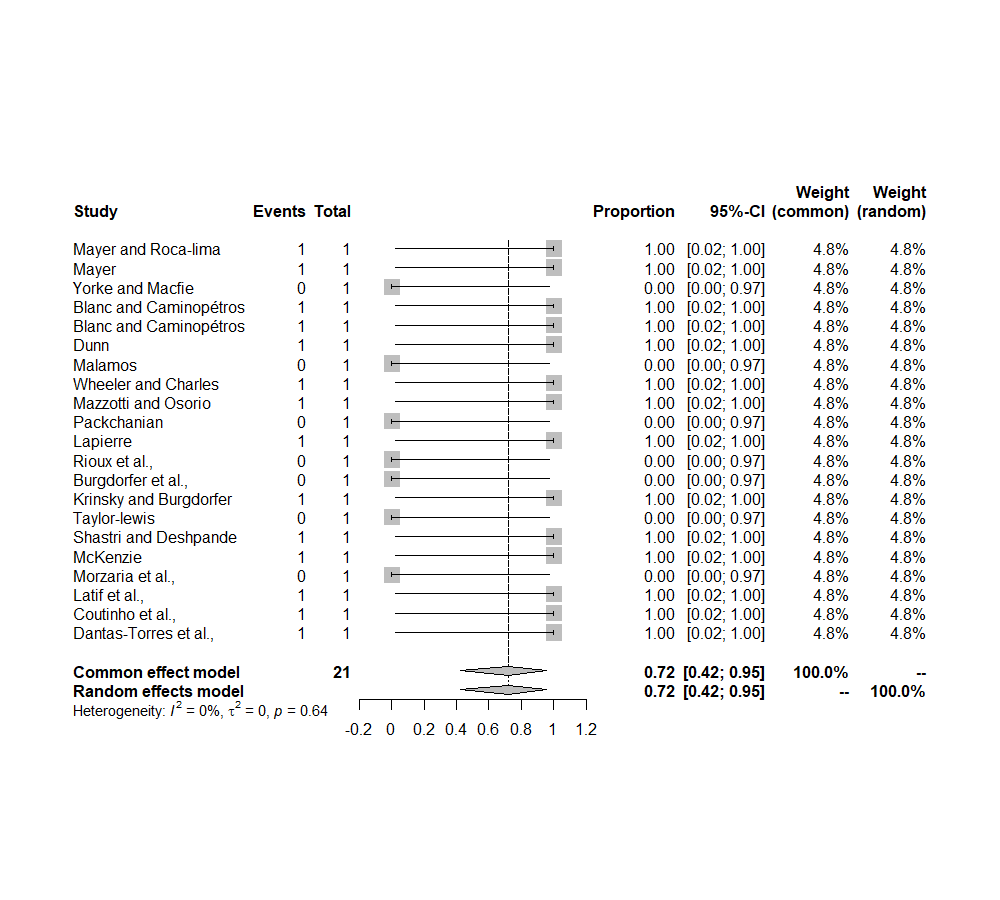


**Figure S2**: Forest plot representation of the successful attempt to transmit Trypanosomatidae via injection of tick-infected material.


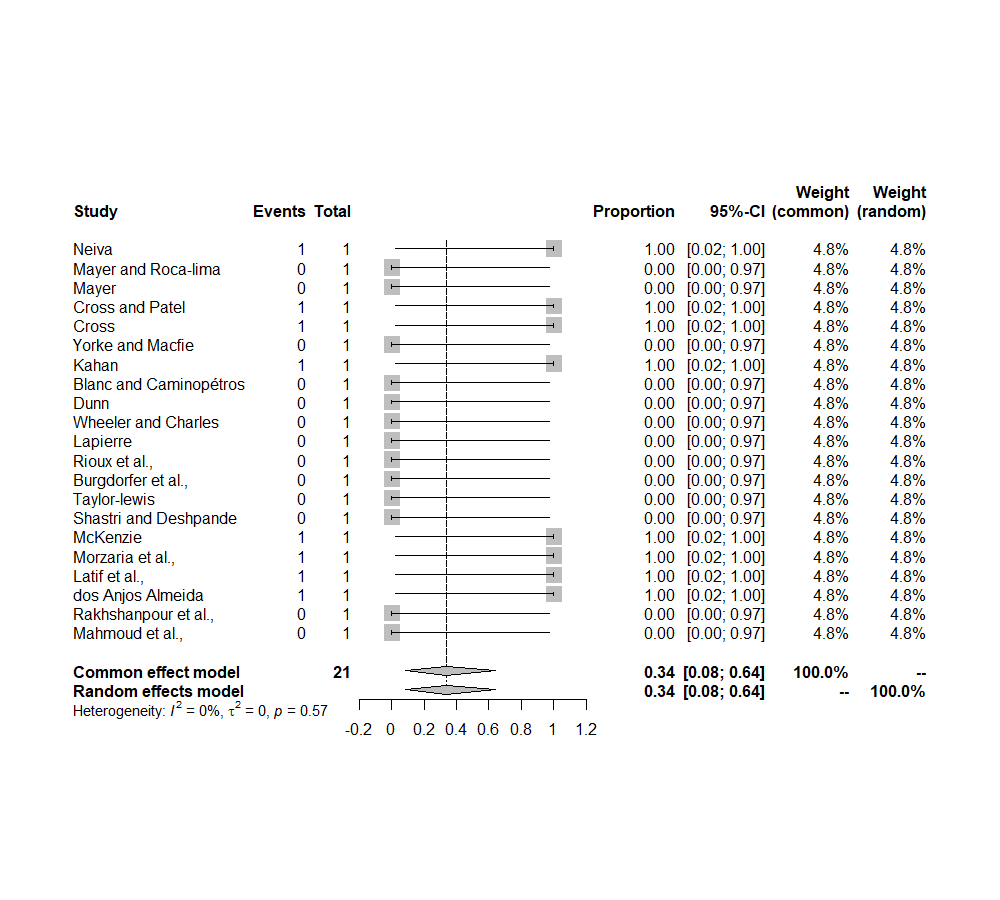


**Figure S3**: Forest plot representation of Trypanosomatidae transmission via ticks blood feeding.


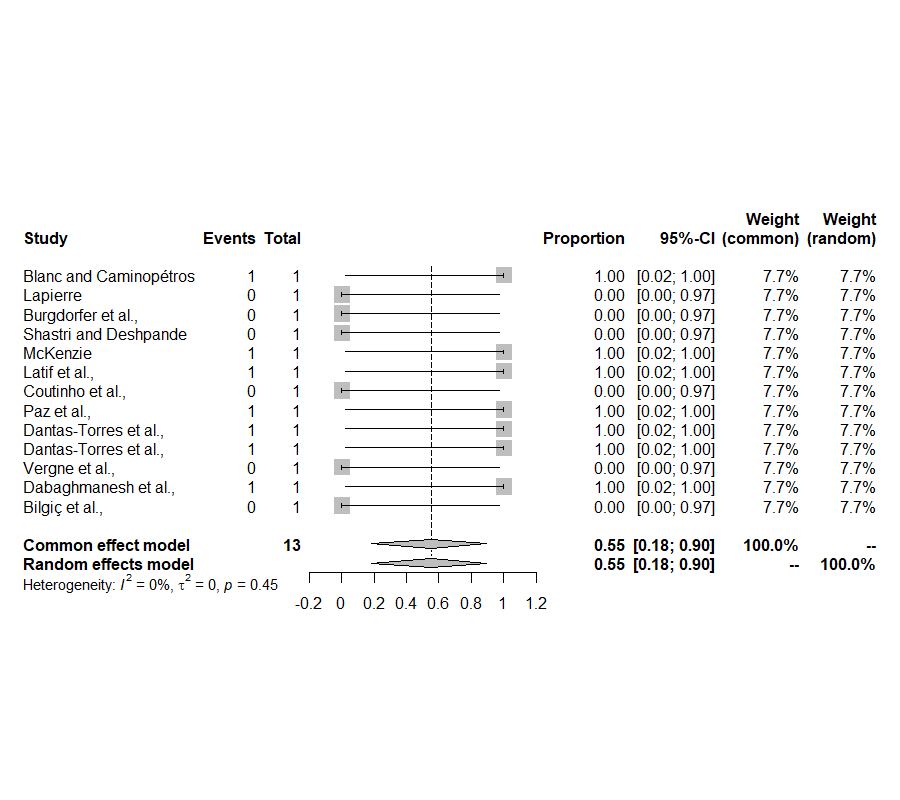


**Figure S4**: Forest plot representation of successful vertical transmission. r
